# Supplementary material
Source: MDPI journal article supplement (https://www.mdpi.com/2073-4441/15/22/3934)
Supplement: s1 [file s1]

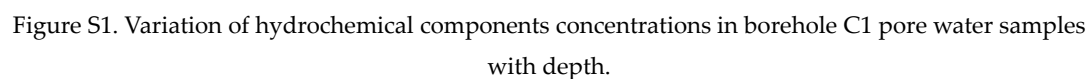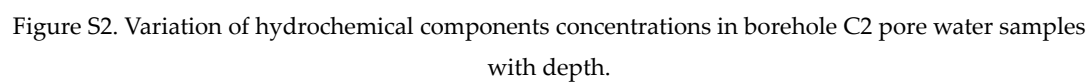

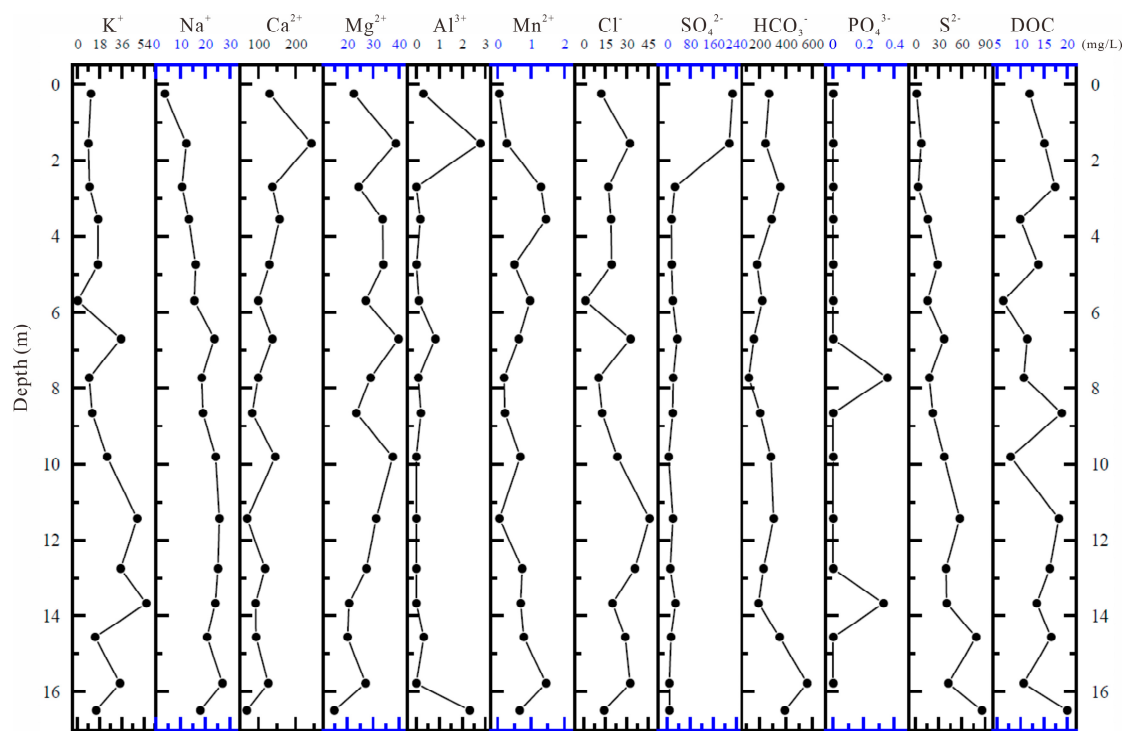

Figure S3. Variation of hydrochemical components concentrations in borehole C3 pore water samples with depth.

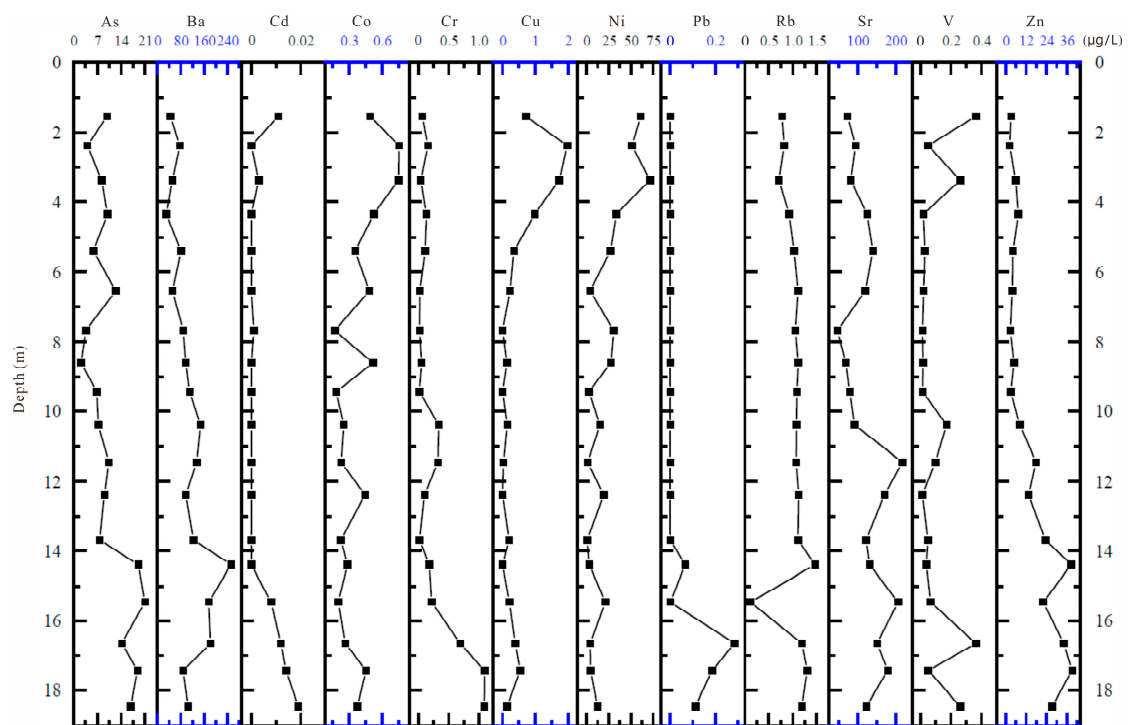

Figure S4. Variation of trace elements concentrations in borehole C1 pore water samples with depth.

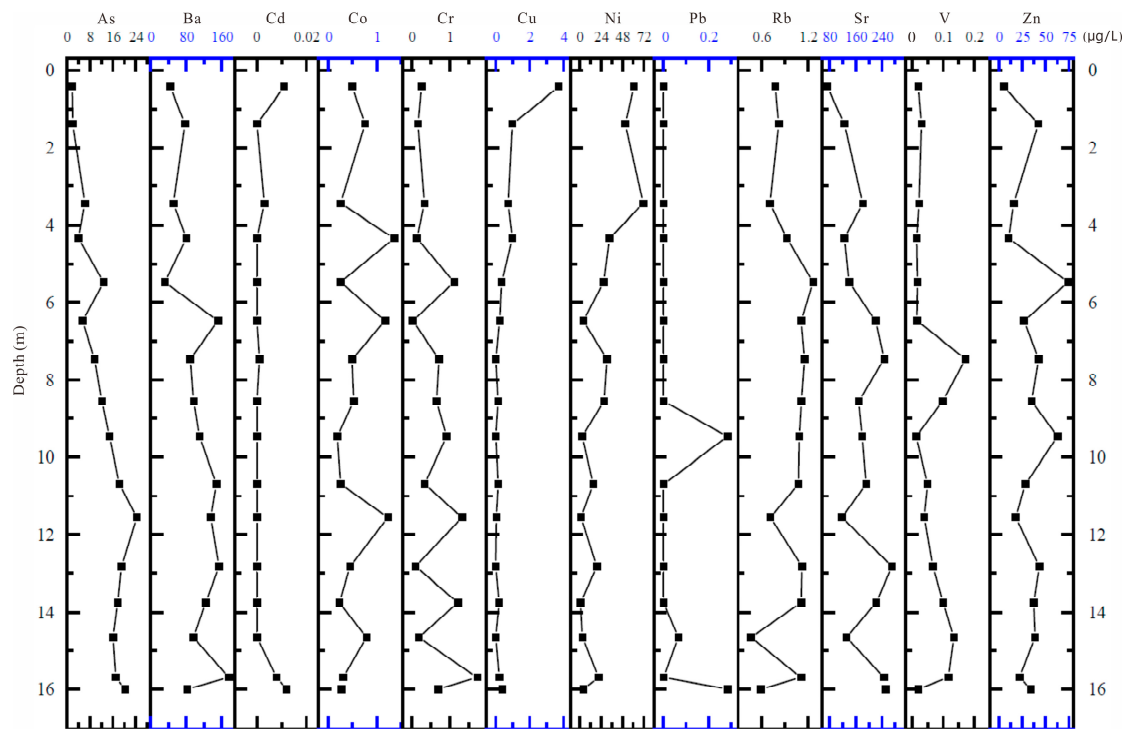

Figure S5. Variation of trace elements concentrations in borehole C2 pore water samples with depth.

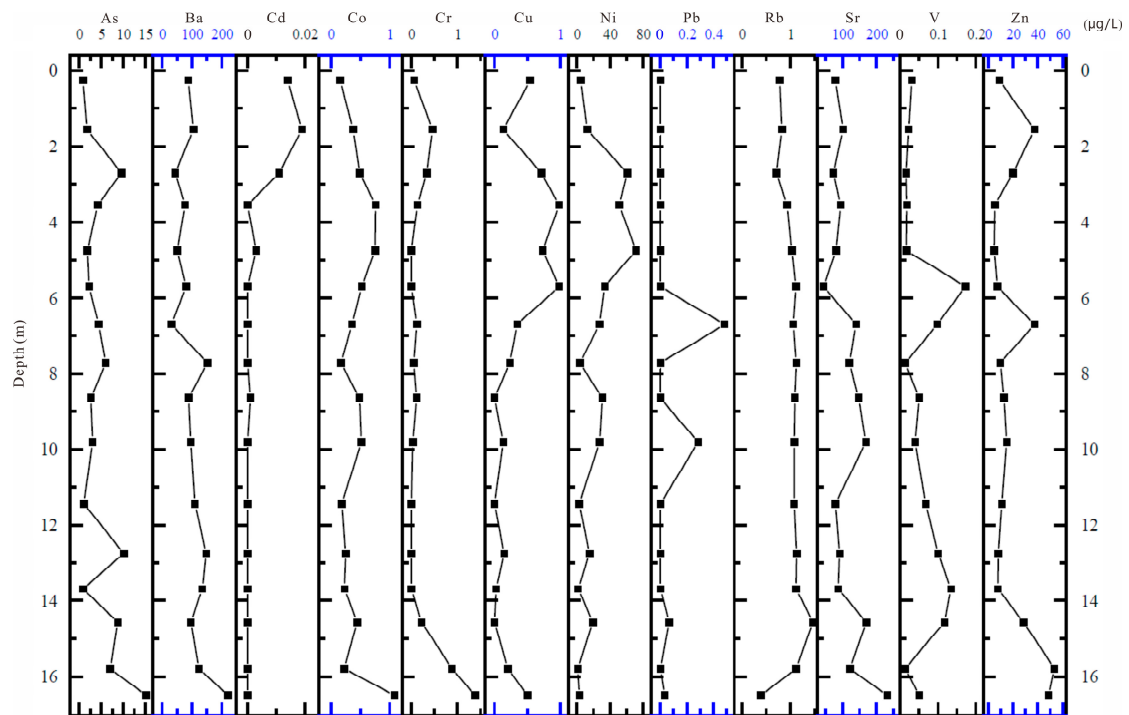

Figure S6. Variation of trace elements concentrations in borehole C3 pore water samples with depth.
